# Supplementary material
Source: publisher figshare collection journal article supplement (https://acs.figshare.com/ndownloader/files/3761545)
Supplement: Supplementary file 1 [file 3761545]

## Supporting Information

### Highly Selective Detection of H<sup>+</sup> and OH<sup>-</sup> with a Single Emissive Iridium(III) Complex: A Mild Approach to Conversion of Non-AIEE to AIEE Complex

Parvej Alam<sup>a</sup>, Gurpreet Kaur,<sup>b</sup> Amrit Sarmah,<sup>a</sup> Ram Kinkar Roy<sup>a</sup>, Angshuman Roy Choudhury,<sup>b</sup> and Inamur Rahaman Laskar<sup>\*a</sup>

<sup>a</sup>Department of Chemistry, Birla Institute of Technology and Science, Pilani Campus, Pilani, Rajasthan, India [ir\\_laskar@pilani.bits-pilani.ac.in](mailto:ir_laskar@pilani.bits-pilani.ac.in); [rkroy@pilani.bits-pilani.ac.in](mailto:rkroy@pilani.bits-pilani.ac.in)

<sup>b</sup>Department of Chemical Sciences, Indian Institute of Science Education and Research (IISER), Mohali, Sector 81, S. A. S. Nagar, Manauli PO, Mohali, Punjab, 140306, India, [angshurc@iisermohali.ac.in](mailto:angshurc@iisermohali.ac.in)

Corresponding author: [ir\\_laskar@pilani.bits-pilani.ac.in](mailto:ir_laskar@pilani.bits-pilani.ac.in)

## Table of Content

|                                                                                                      |     |
|------------------------------------------------------------------------------------------------------|-----|
| <b>Figure S1a.</b> <sup>1</sup> H NMR for for N <sup>1</sup> -tritylethane-1,2-diamine [ <b>L1</b> ] | S3  |
| <b>Figure S1b.</b> HRMS for for N <sup>1</sup> -tritylethane-1,2-diamine [ <b>L1</b> ]               | S4  |
| <b>Figure S2a.</b> <sup>1</sup> H NMR for for <b>1</b>                                               | S5  |
| <b>Figure S2b.</b> <sup>19</sup> F NMR for for <b>1</b>                                              | S6  |
| <b>Figure S2c.</b> HRMS for for <b>1</b>                                                             | S7  |
| <b>Figure S3a.</b> <sup>1</sup> H NMR for for <b>2</b>                                               | S8  |
| <b>Figure S3b.</b> <sup>19</sup> F NMR for for <b>2</b>                                              | S9  |
| <b>Figure S3c.</b> <sup>1</sup> H NMR spectra of <b>1</b> after addition of 1M NaOH                  | S10 |
| <b>Figure S3d.</b> <sup>19</sup> F NMR spectra of <b>1</b> after addition of 1M NaOH                 | S11 |
| <b>Figure S3e.</b> HRMS for for <b>2</b>                                                             | S12 |
| <b>Figure S3f.</b> Expansion of HRMS for <b>2</b>                                                    | S13 |
| <b>Figure S3g.</b> IR spectra for <b>2</b>                                                           | S14 |
| <b>Figure S4a.</b> <sup>1</sup> H NMR for <b>3</b>                                                   | S15 |
| <b>Figure S4b.</b> <sup>19</sup> F NMR for <b>3</b>                                                  | S16 |
| <b>Figure S4c.</b> HRMS for for <b>3</b>                                                             | S17 |
| <b>Figure S4d.</b> Expansion of HRMS for <b>3</b>                                                    | S18 |
| <b>Figure S5a.</b> <sup>1</sup> H NMR for <b>1</b> after addition of AcOH                            | S19 |
| <b>Figure S5b.</b> <sup>19</sup> F NMR for <b>1</b> after addition of AcOH                           | S20 |

|                                                                                                                                                                                                                        |     |
|------------------------------------------------------------------------------------------------------------------------------------------------------------------------------------------------------------------------|-----|
| <b>Figure S6.</b> Emission spectra of <b>1</b> in different solvents keeping concentration same,<br>[c]=1x10 <sup>-5</sup> .....                                                                                       | S21 |
| <b>Figure S7.</b> Cyclic voltammogram of <b>1</b> , recorded in ACN at a scan rate of 0.05 V s <sup>-1</sup> .....                                                                                                     | S21 |
| <b>Figure S8.</b> Optimized structure of <b>1</b> , (using Gaussian 09 program suite) in DCM solvent.....                                                                                                              | S22 |
| <b>Figure S9.</b> Absorbance spectra of <b>1</b> with increasing concentration of TFA (0-15 µL)<br>with [c] =1x10 <sup>-5</sup> .....                                                                                  | S23 |
| <b>Figure S10.</b> Emission spectra of <b>1</b> in DCM , DCM+ TFA and THF+ 1M NaOH<br>in water (1:9,v/v) .....                                                                                                         | S24 |
| <b>Figure S11.</b> Emission spectra of <b>1</b> in presence of different water fraction (0- 90%).....                                                                                                                  | S24 |
| <b>Figure S12.</b> Thin film emission of <b>1</b> and <b>2</b> .....                                                                                                                                                   | S25 |
| <b>Figure S13.</b> Transmission electron microscopy (TEM) image of complex <b>2</b> in different<br>water fraction (40% and 90%).....                                                                                  | S26 |
| <b>Figure S14.</b> (a) Size distribution graph for <b>1</b> .....                                                                                                                                                      | S27 |
| (b) Size distribution graph for <b>2</b> .....                                                                                                                                                                         | S28 |
| <b>Table S1.</b> Crystal data and structure refinement for <b>1</b> .....                                                                                                                                              | S29 |
| <b>Table S2.</b> Selected Bond lengths [Å] and angles [°] for <b>1</b> .....                                                                                                                                           | S30 |
| <b>Table S3</b> Photophysical properties of <b>1</b> and <b>2</b> .....                                                                                                                                                | S31 |
| <b>Table S4.</b> Comparison of some selected structural parameters<br>(i.e., bond distances and bond angles) for the complex <b>1</b> obtained from experiment<br>(i.e., X-ray study) and theoretical calculation..... | S32 |
| <b>Detection limit calculation</b> .....                                                                                                                                                                               | S33 |

NMPR sep  
IR S30 B  
PROTON CDCl3 /opt/topspin nmrsu 19

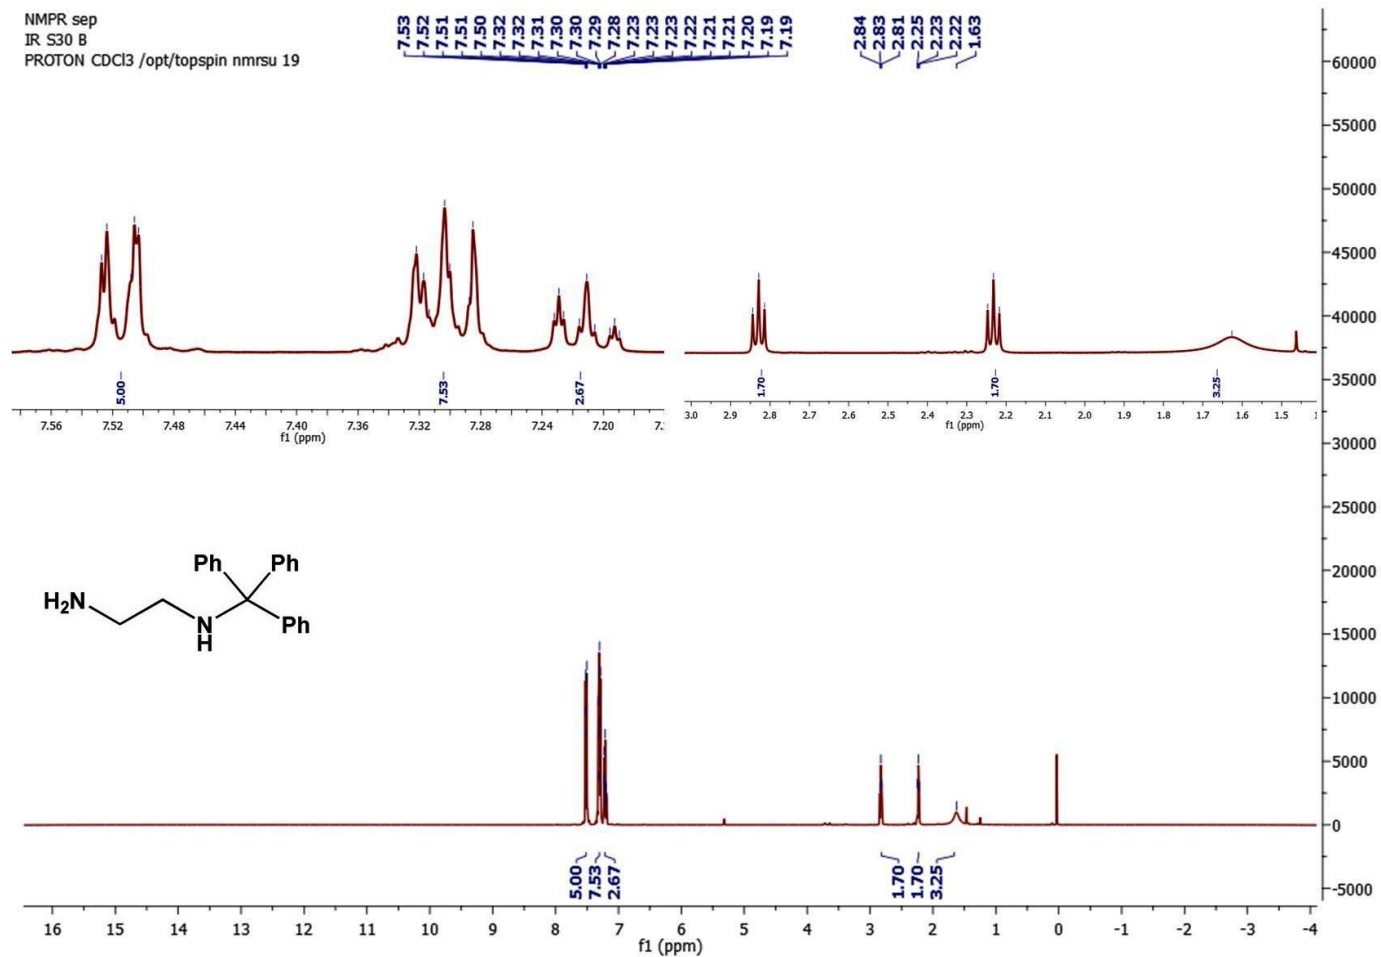

a

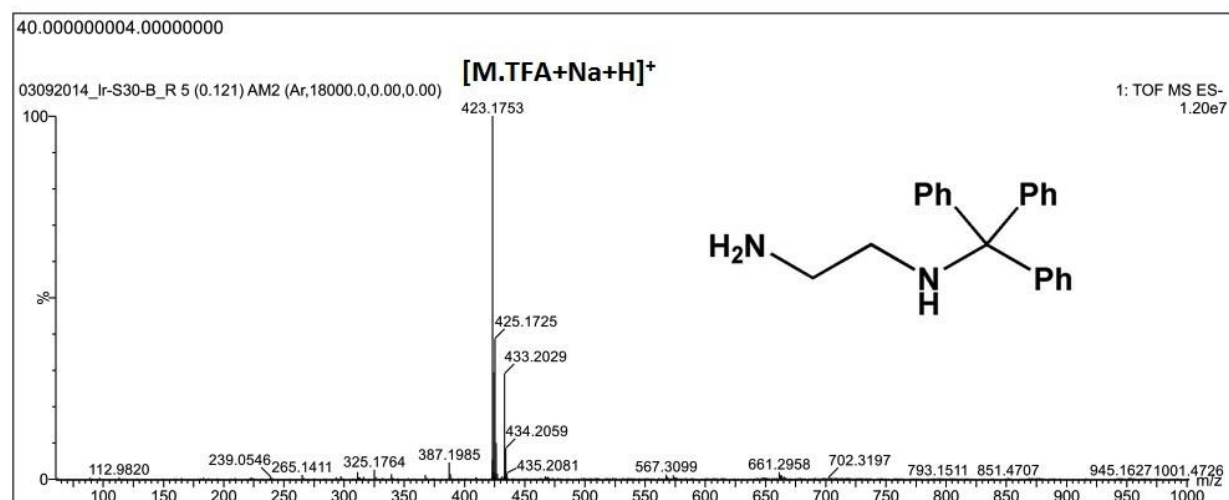

b

**Figure S1.** (a) <sup>1</sup>H NMR spectra of ligand in CDCl<sub>3</sub> (b) HRMS data of the ligand.

Feb16-2015  
Ir-S3O-ED

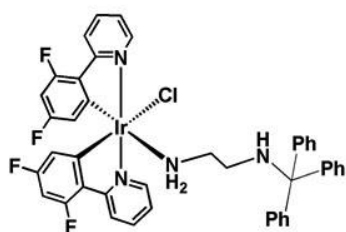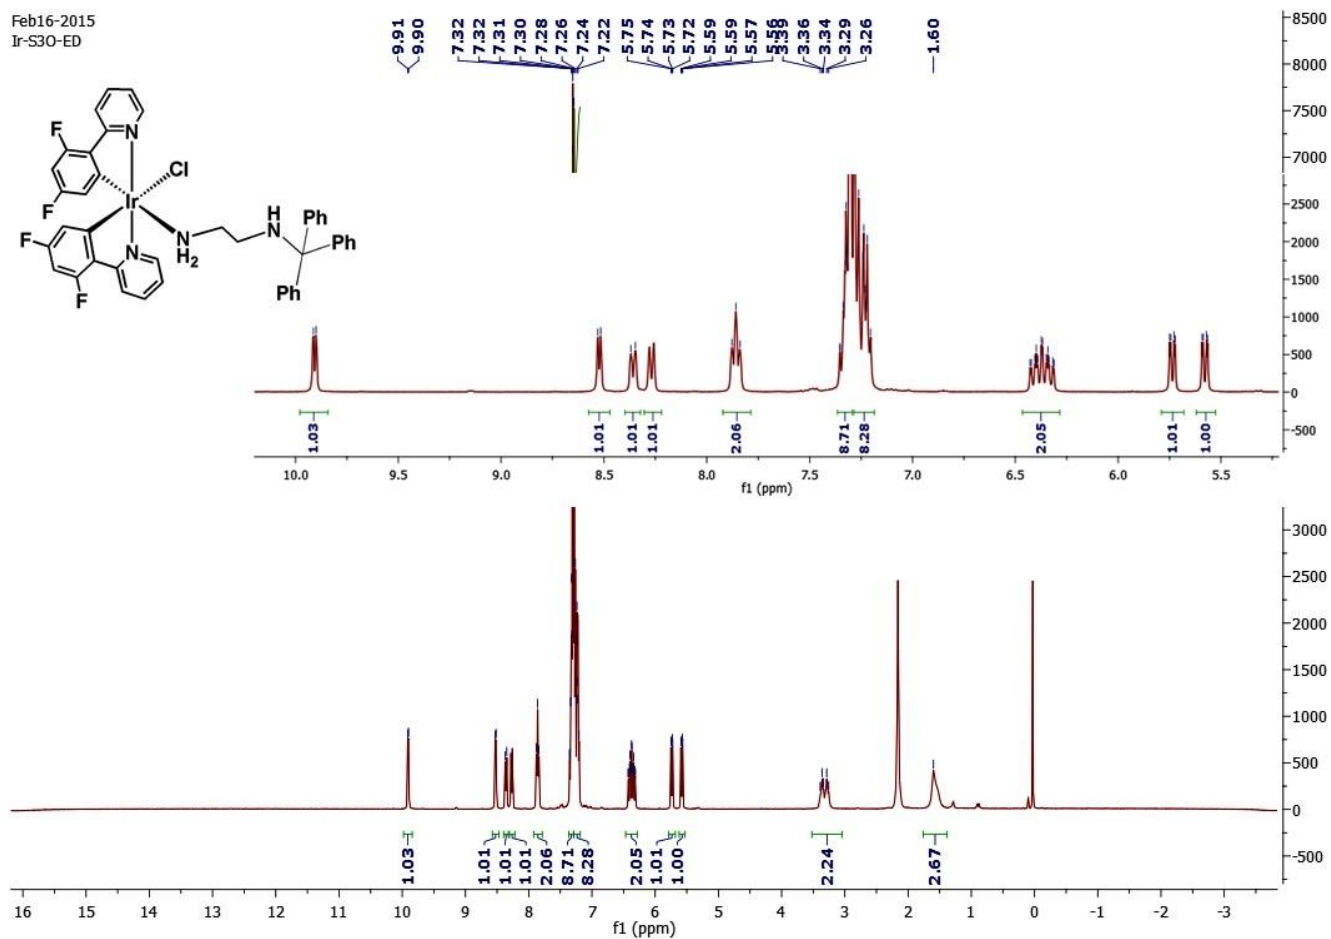

a

arc-july30-2014  
 IR S 30 A  
 F19CPD CDCl3 /opt/topspin nmrsu 46

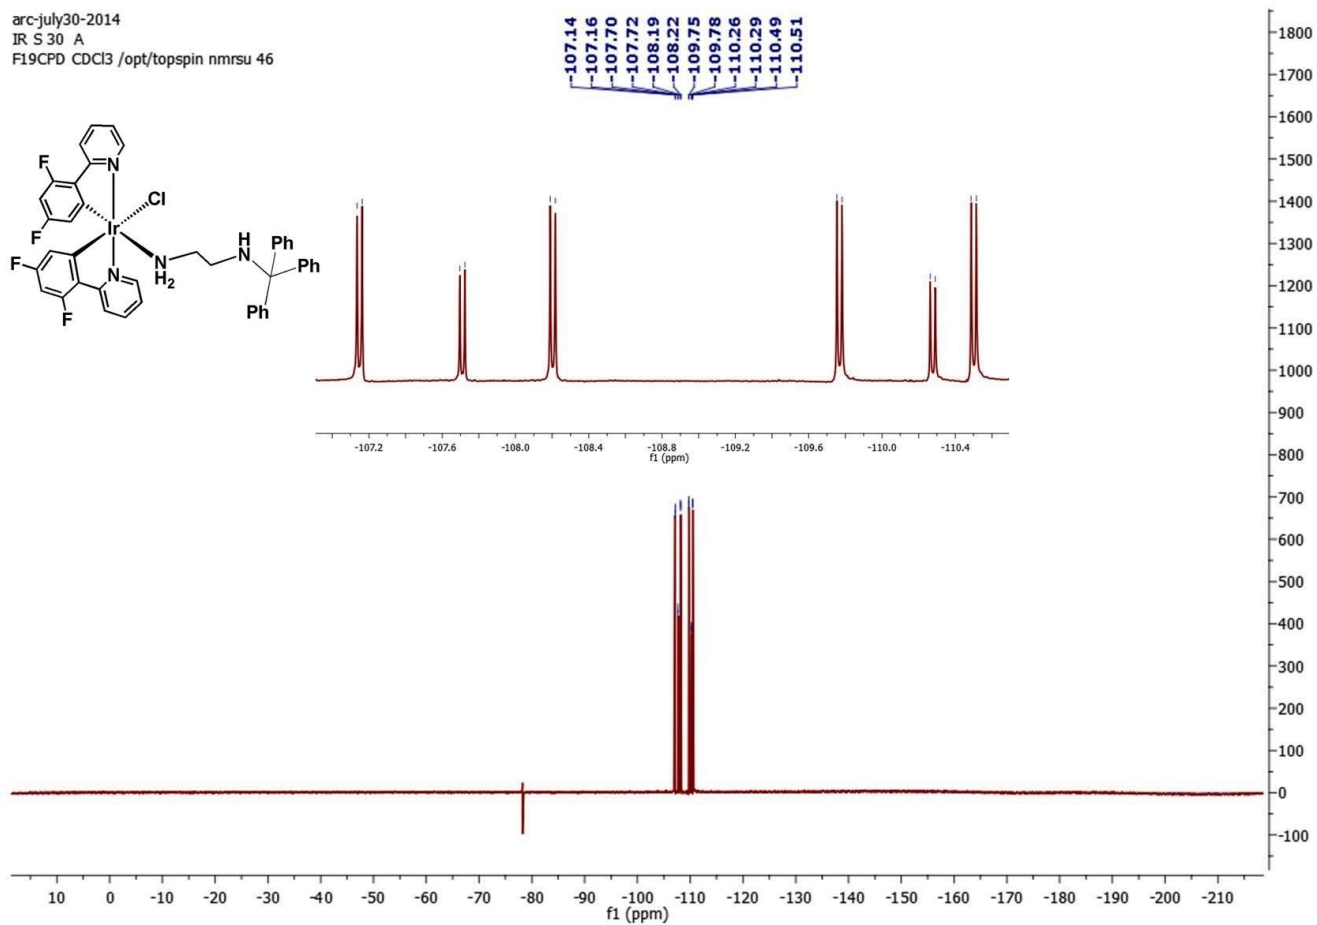

b

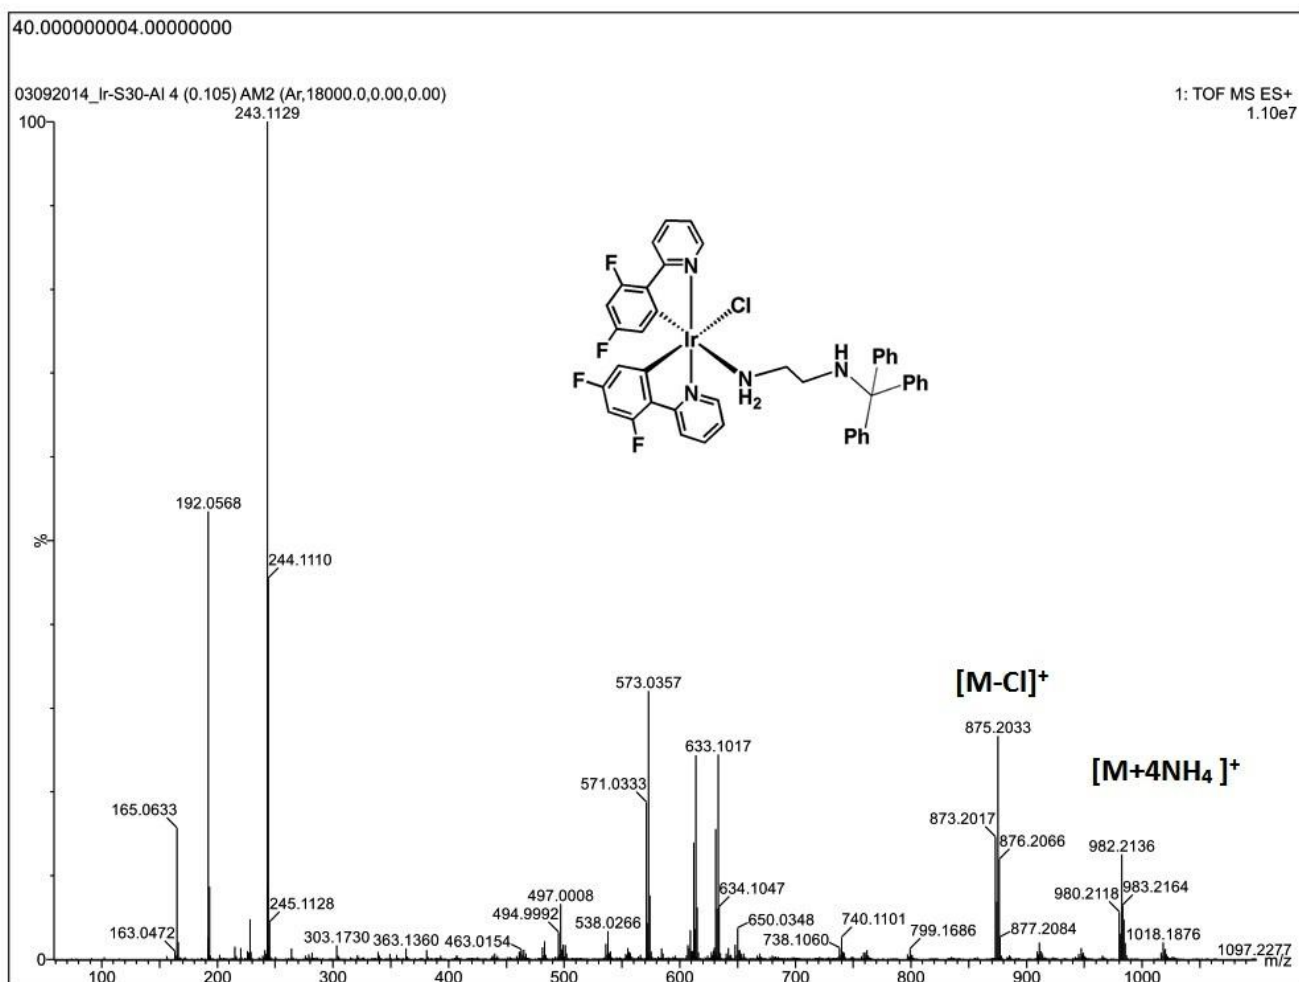

c

**Figure S2.** (a)  $^1\text{H}$  NMR spectra of **1** in  $\text{CDCl}_3$ ; (b)  $^{19}\text{F}$  NMR spectra of **1** in  $\text{CDCl}_3$  (c) HRMS data of **1**.

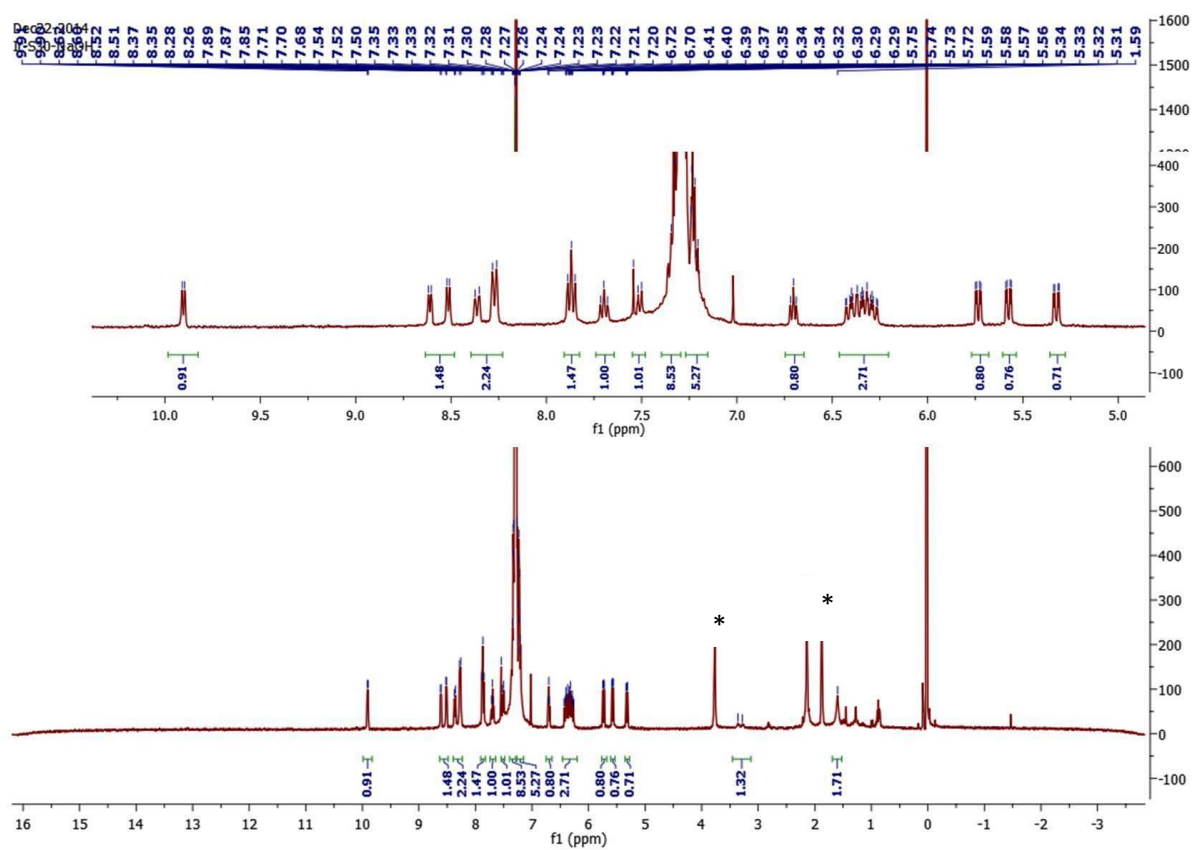

a



Jun30-2015  
Ir-S3-NAOH4

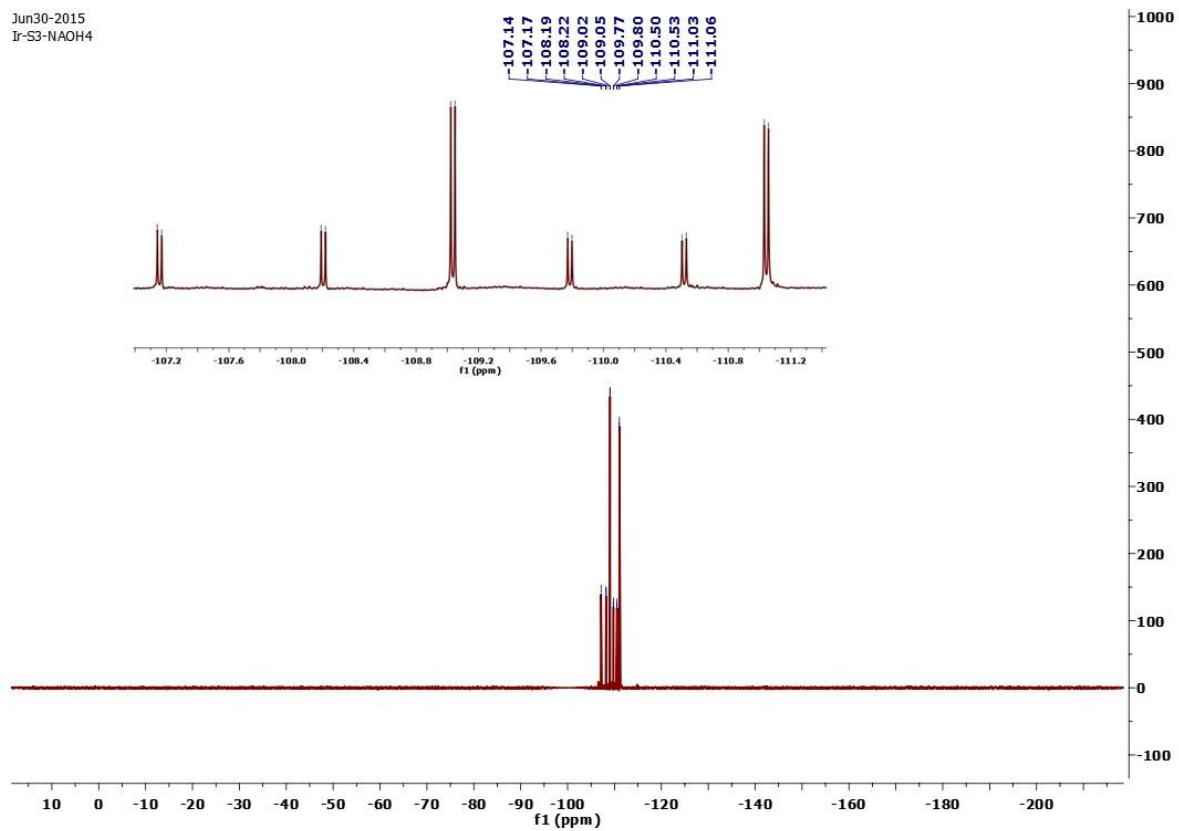

b

Dec31-2014  
IRS30NAOH

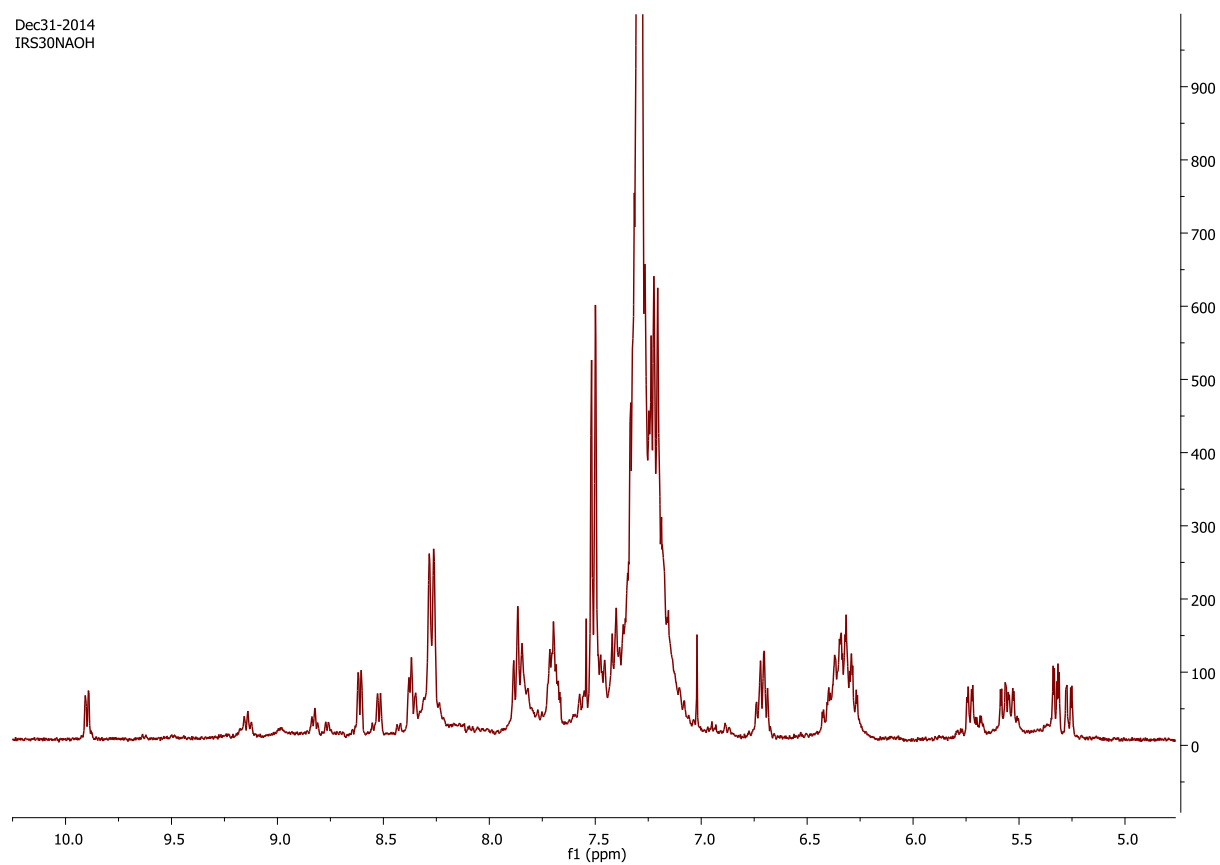

C

Jun30-2015  
Ir-S3-NAOH8

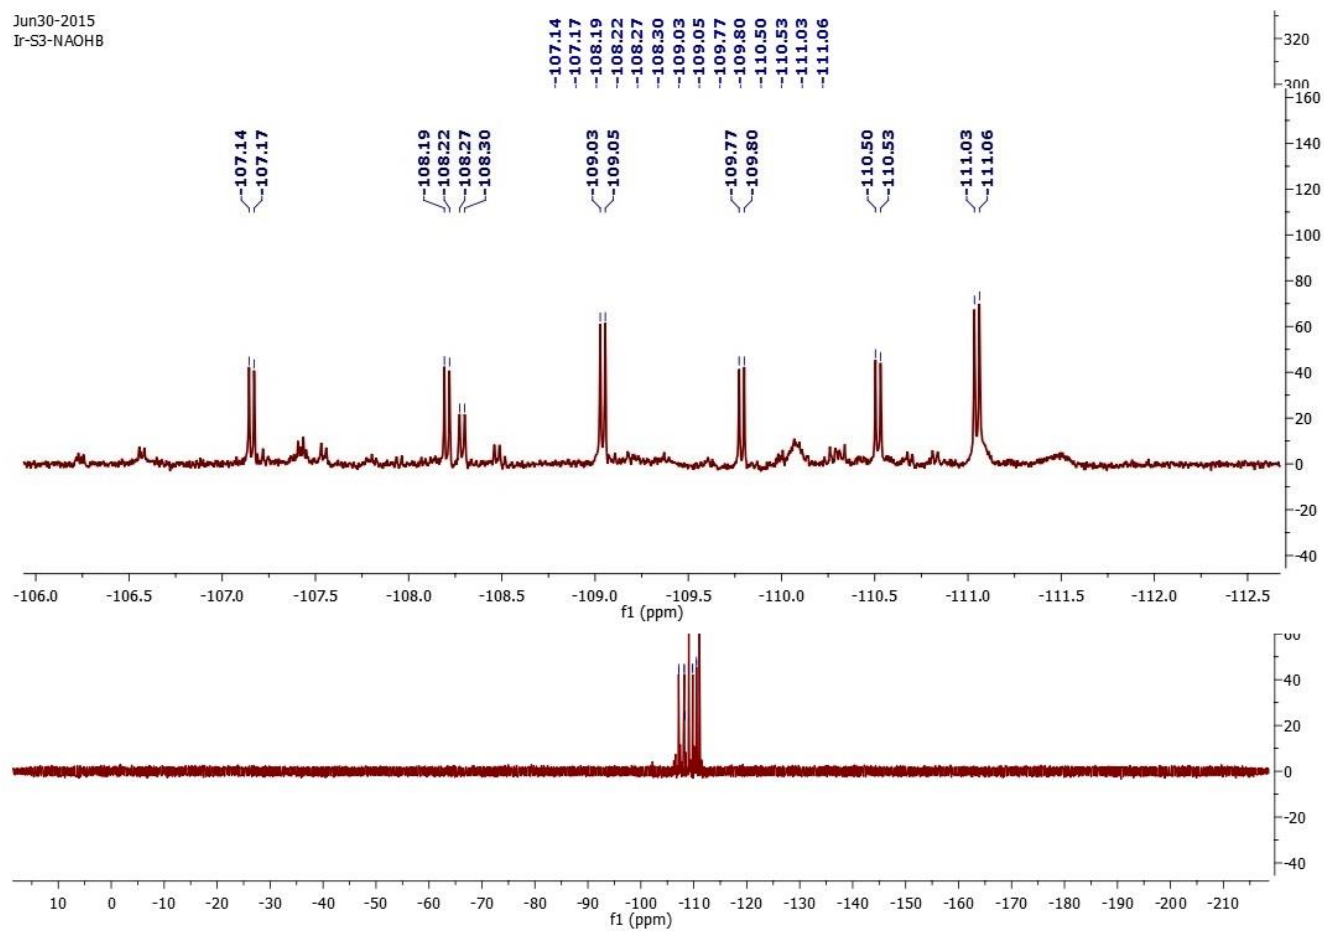

d

Ir-S30-NaOH

14012015\_Ir-S30-NaOH 33 (0.674) AM2 (Ar,18000.0,0.00,0.00); Cm (33:42)

1: TOF MS ES+  
2.00e8

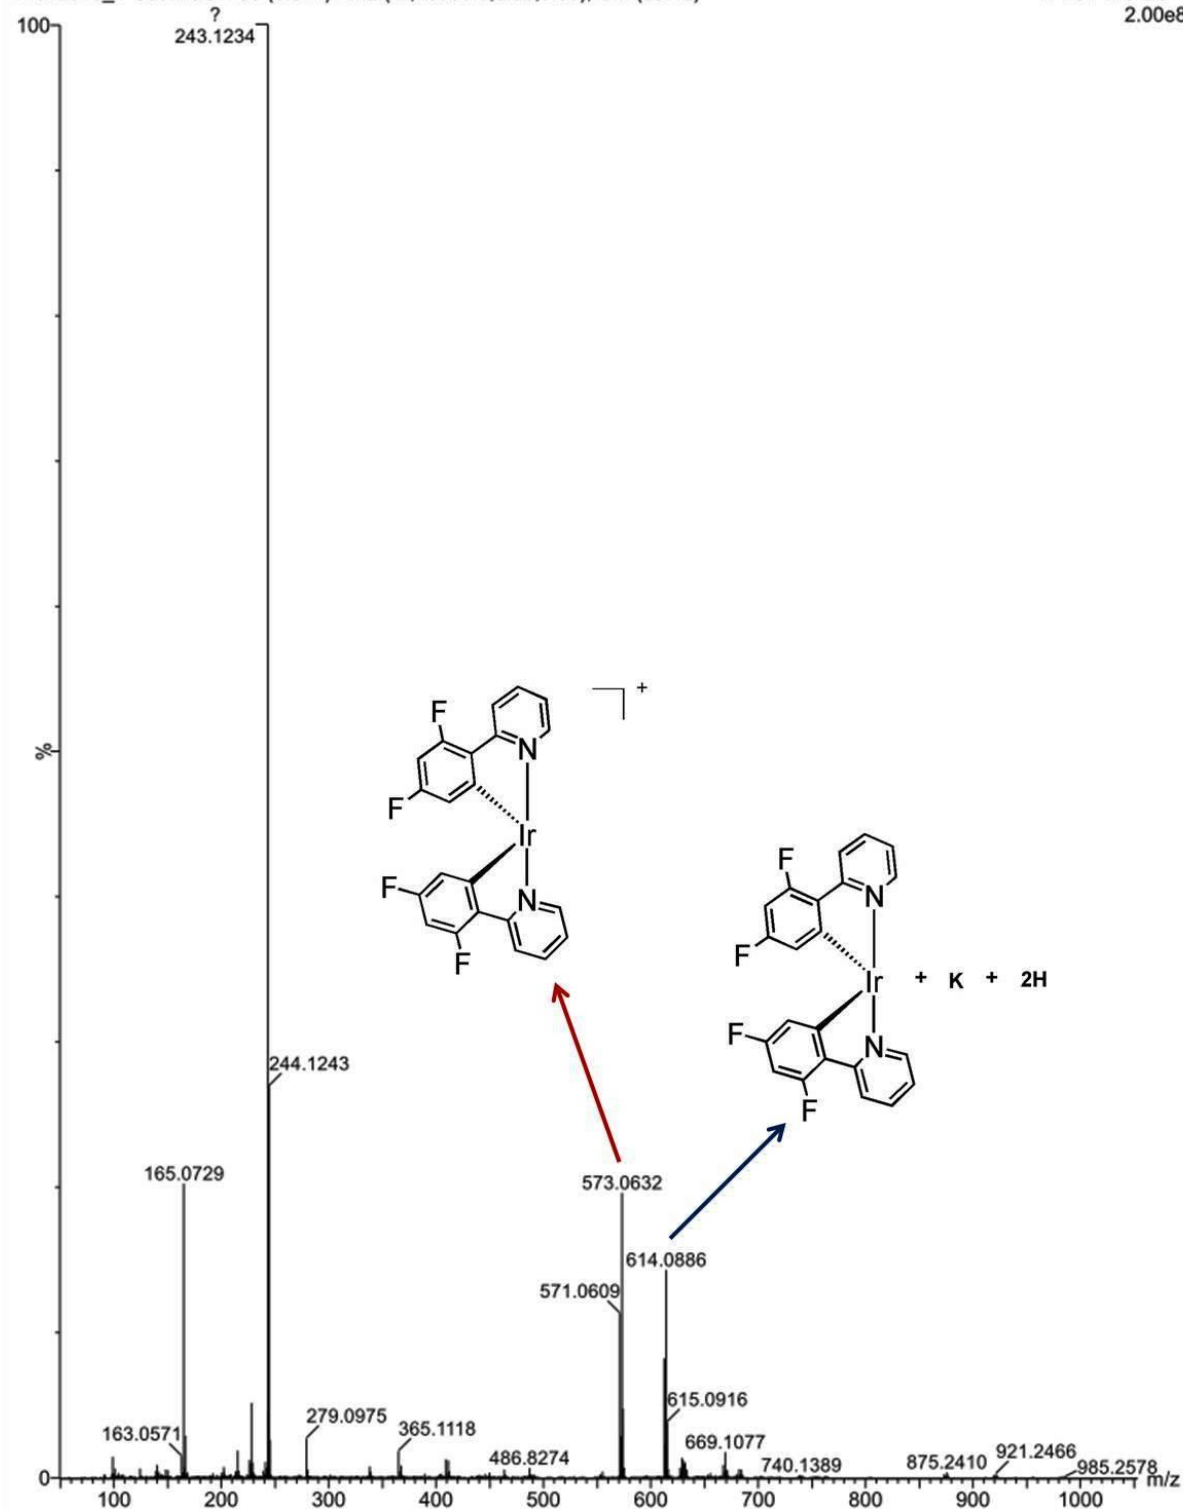

e

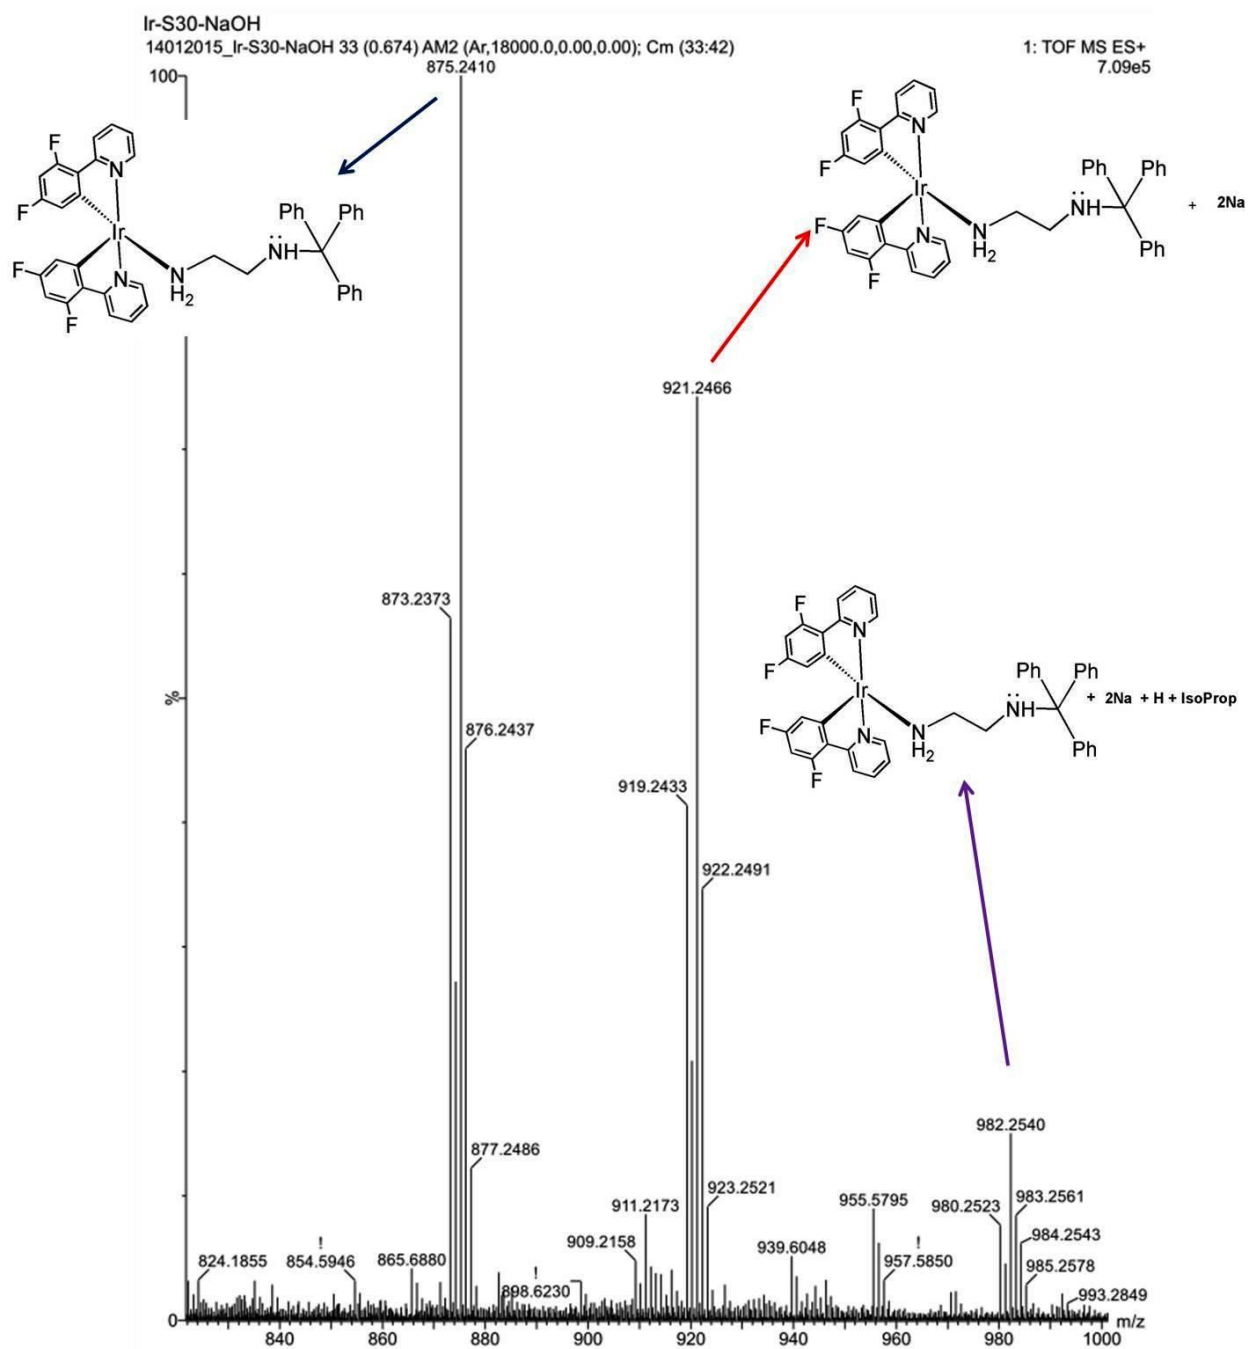

f

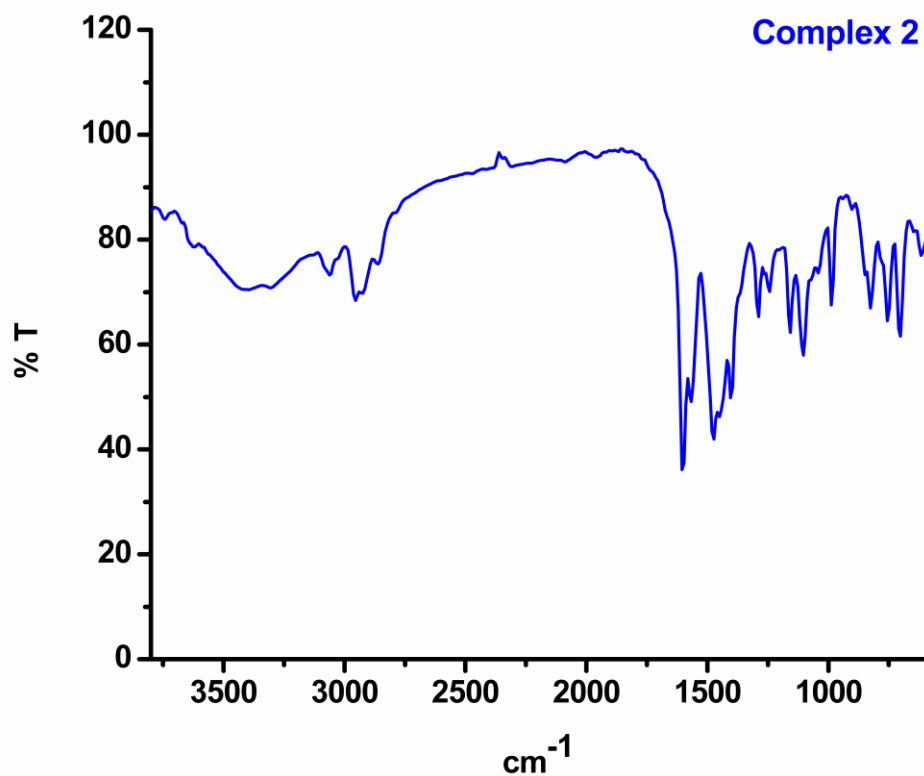

g

**Figure S3.** (a)  $^1\text{H}$  NMR spectra of purified **2** in  $\text{CDCl}_3$ ; (b)  $^{19}\text{F}$  NMR spectra of purified **2** in  $\text{CDCl}_3$ ; (c)  $^1\text{H}$  NMR spectra of **1** after addition of 1M NaOH; (d)  $^{19}\text{F}$  NMR spectra of **1** after addition of 1M NaOH (top: extended; bottom: full); (e) HRMS data of **2**; (f) Expansion of HRMS data of the **2**; (g) IR spectra of **2** showing  $-\text{OH}$  stretching frequency at  $3421\text{cm}^{-1}$

ir-s30-a+

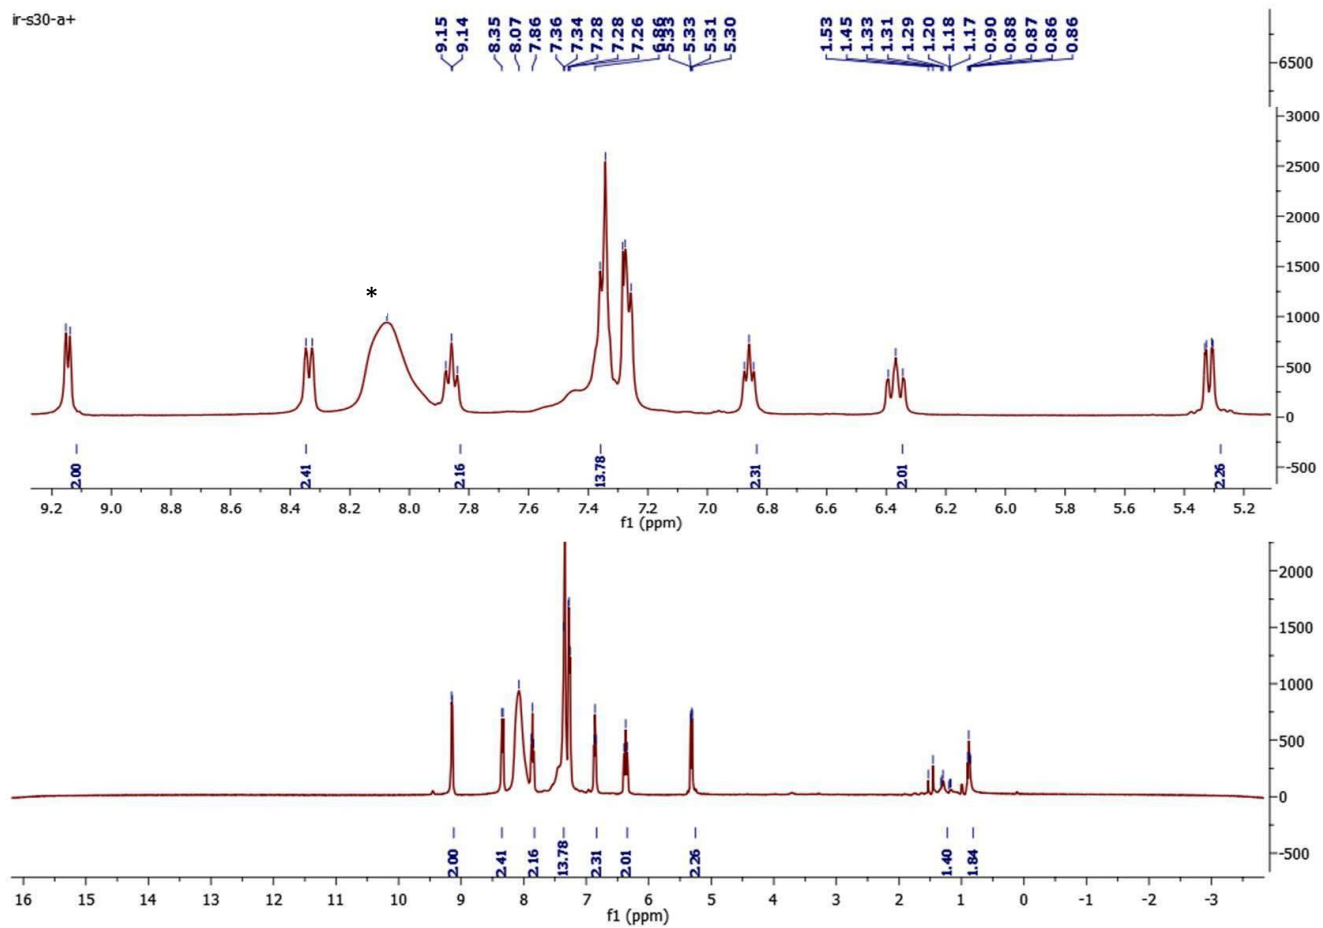

a

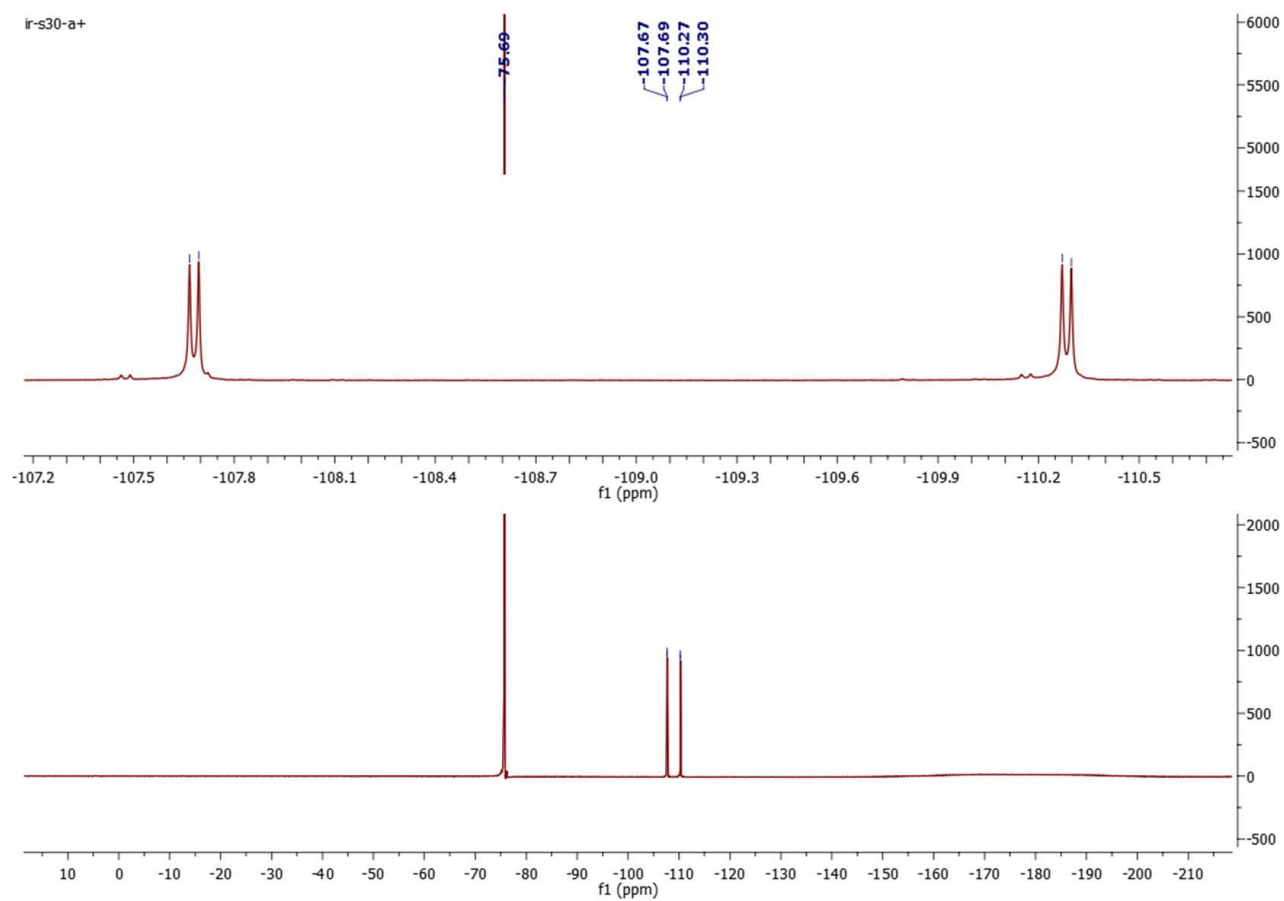

b



Ir-S30-H+

14012015\_Ir-S30-H+ 19 (0.398) AM2 (Ar,18000.0,0.00,0.00)

1: TOF MS ES+  
1.65e7

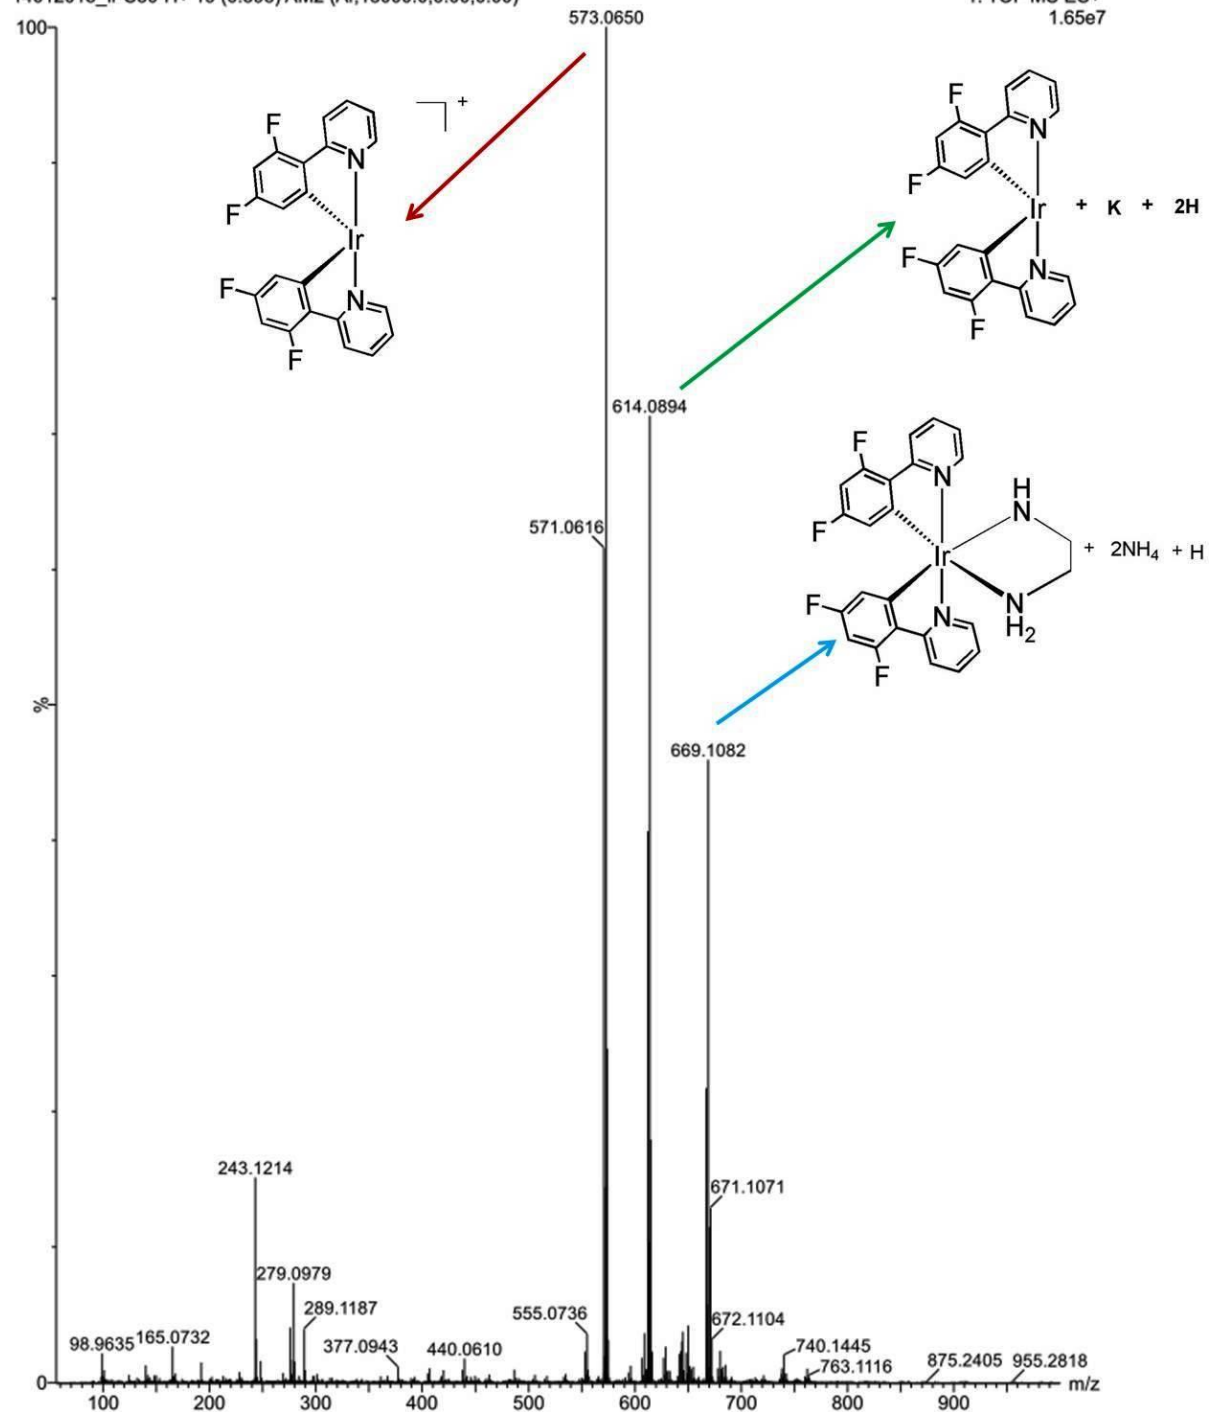

c

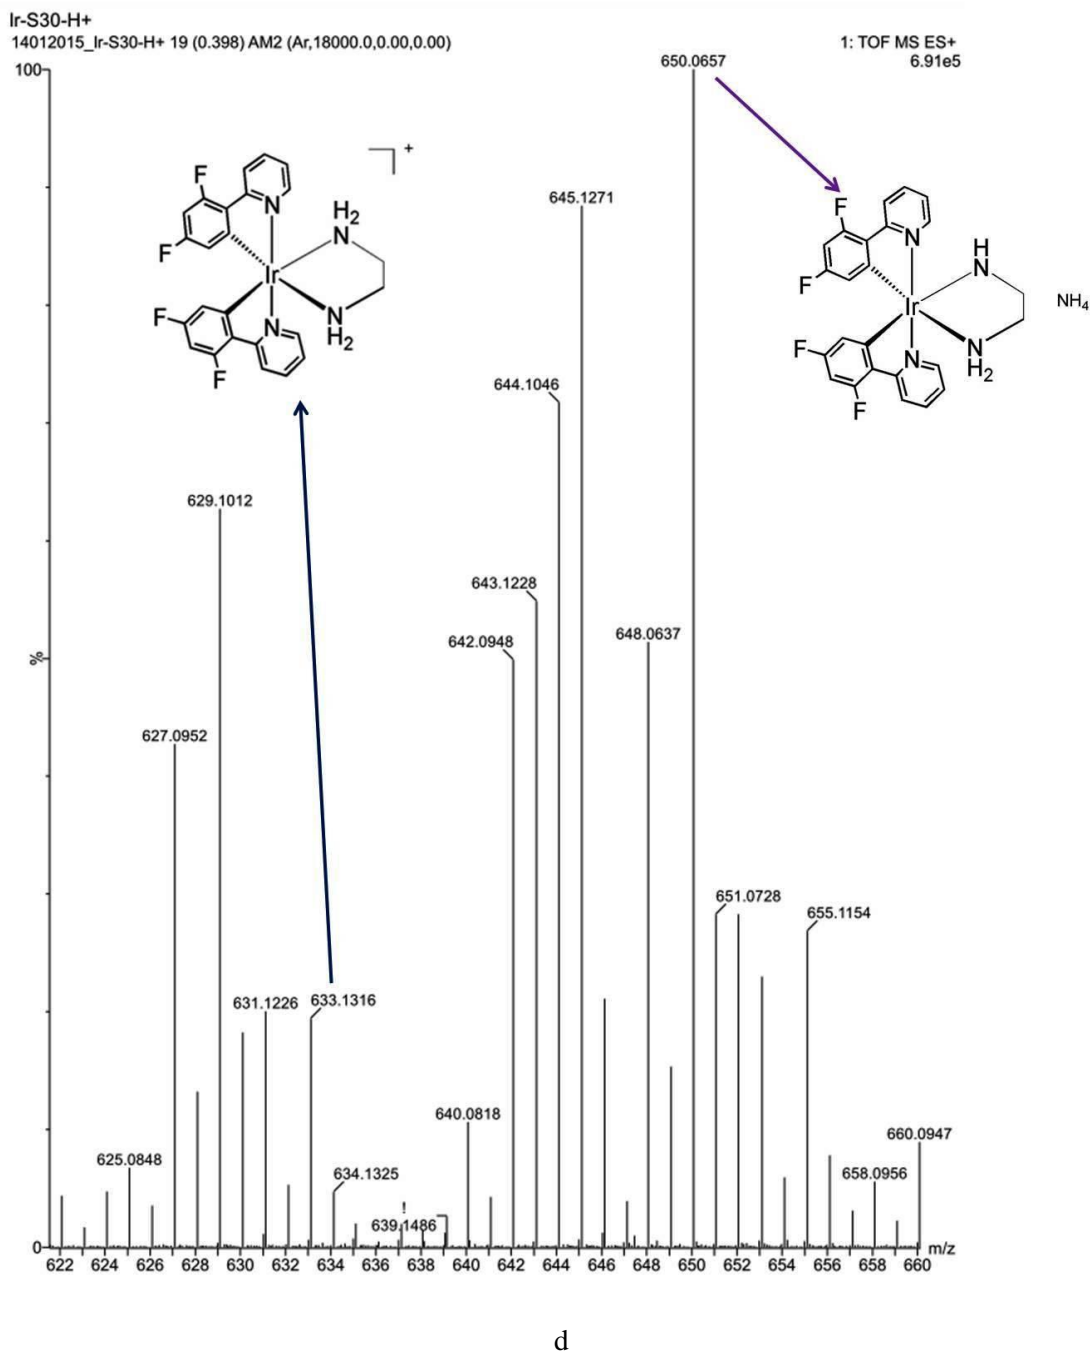

**Figure S4.** (a)  $^1\text{H}$  NMR spectra of **3** in  $\text{CDCl}_3$  (\* TFA, acid proton signal in  $^1\text{H}$  NMR); (b)  $^{19}\text{F}$  NMR spectra of **3** in  $\text{CDCl}_3$  (c) HRMS data of **3** (d) Expansion of HRMS data of the **3**.

Apr14-2015  
Ir-S30-entace

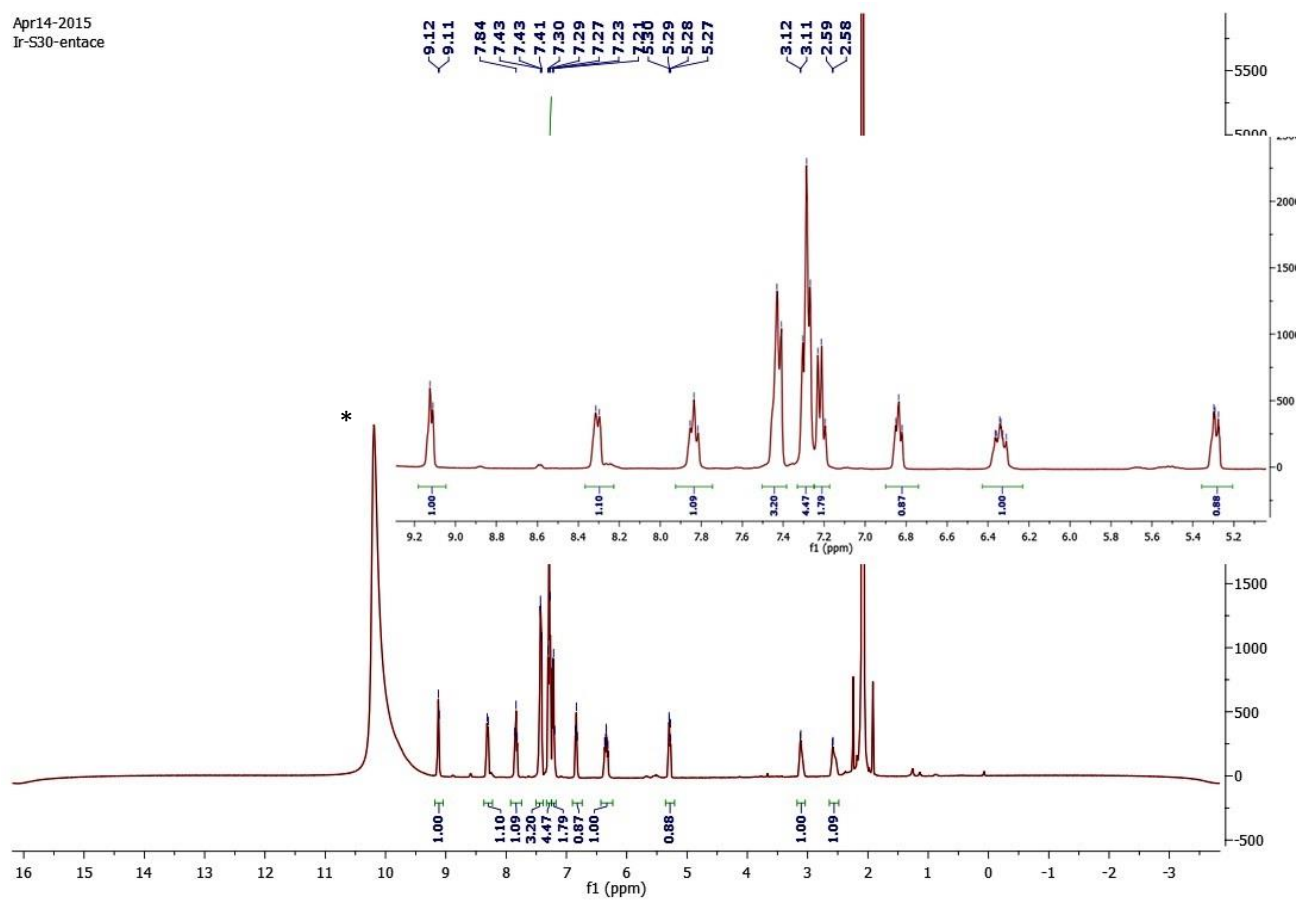

a

Apr14-2015  
Ir-S30-entace

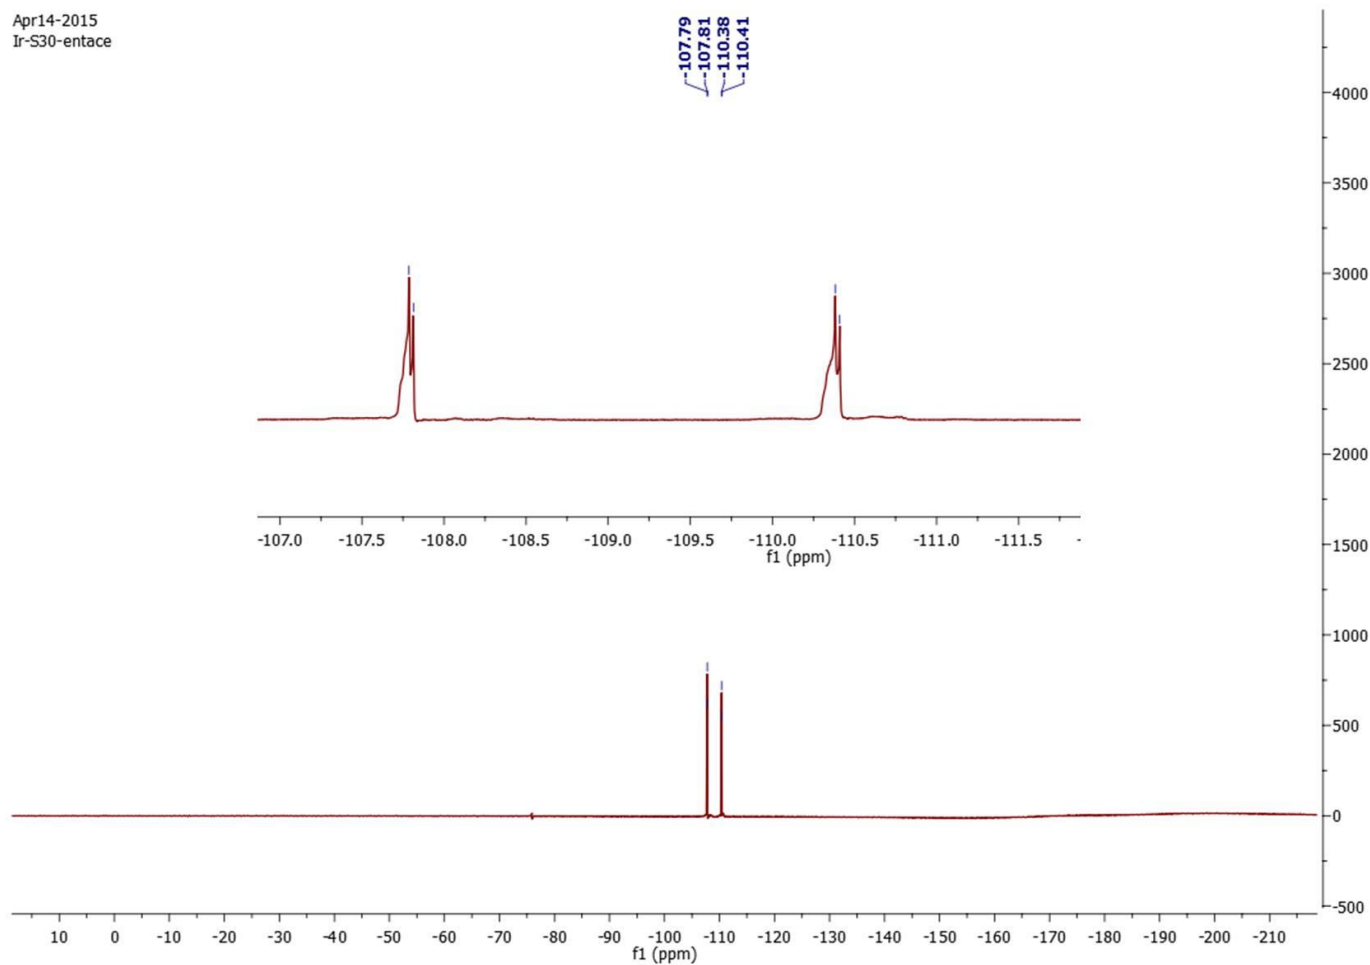

b

**Figure S5.** (a)  $^1\text{H}$  NMR spectra of **1** in  $\text{CDCl}_3$  after addition of AcOH (\*AcOH, acid proton signal in  $^1\text{H}$  NMR) ; (b)  $^{19}\text{F}$  NMR spectra of **1** in  $\text{CDCl}_3$  after addition of AcOH

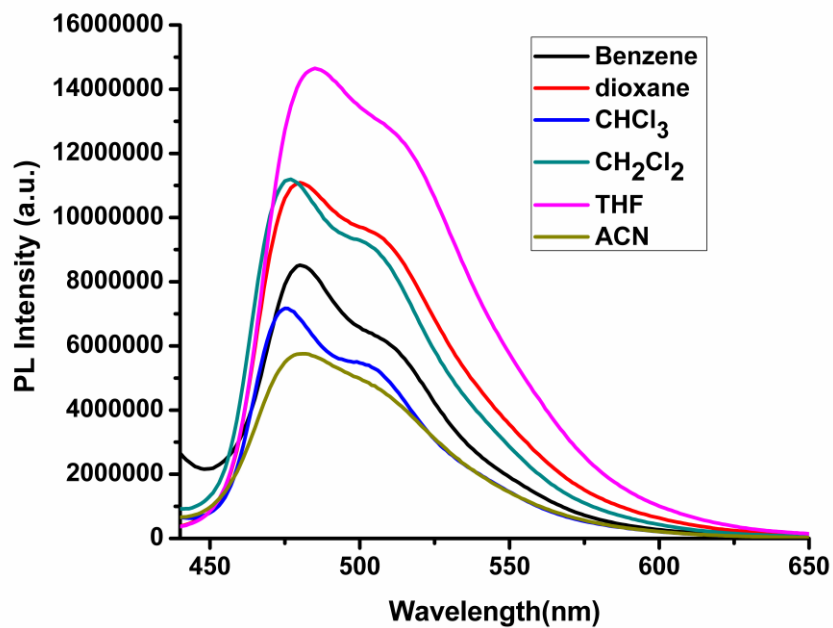

**Figure S6.** Emission spectra of **1** in different solvents keeping concentration same,  $[c]=1 \times 10^{-5}$

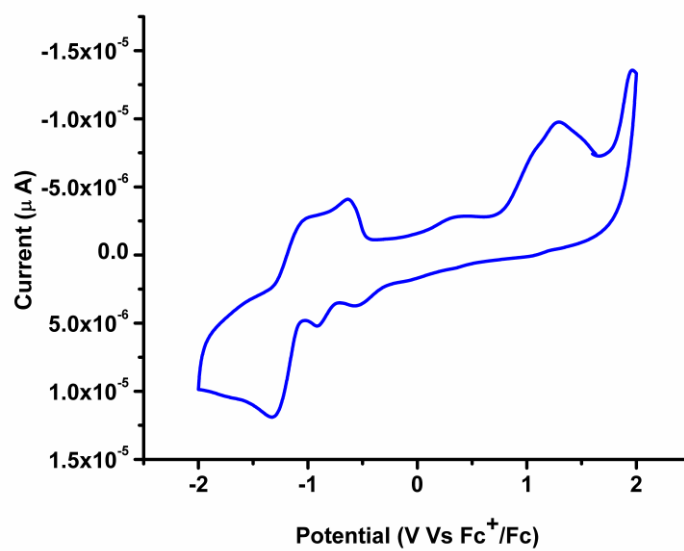

**Figure S7.** Cyclic voltammogram of **1**, recorded in ACN at a scan rate of  $0.05 \text{ V s}^{-1}$

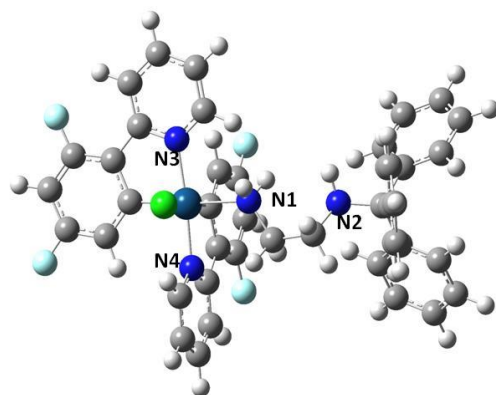

**Figure S8.** Optimized structure of **1**, (using Gaussian 09 program suite) in DCM solvent.

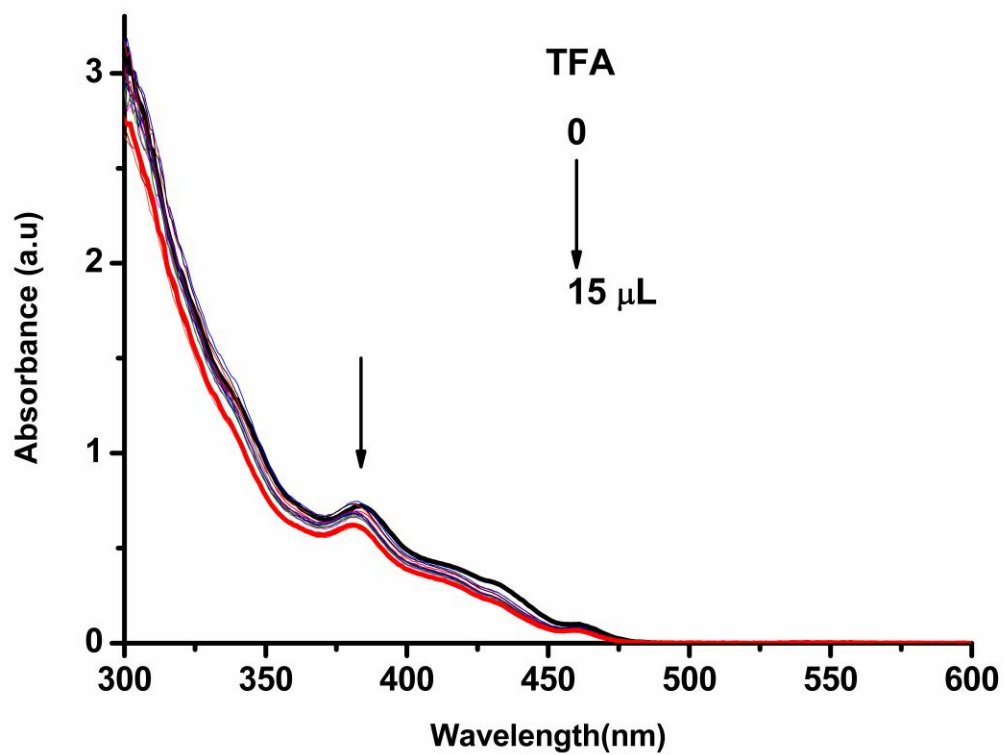

**Figure S9.** Absorbance spectra of **1** with increasing concentration of TFA (0-15  $\mu\text{L}$ ) with  $[c] = 1 \times 10^{-5}$

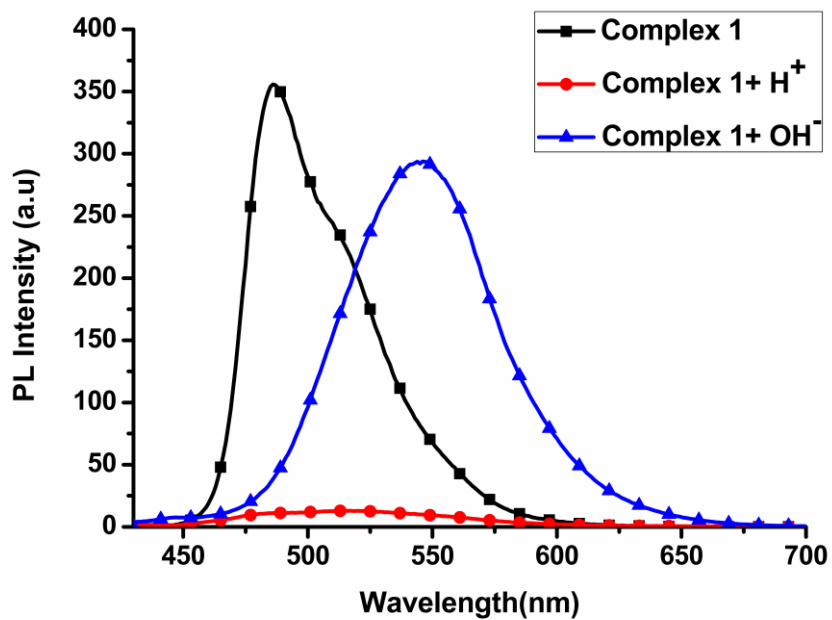

**Figure S10.** Emission spectra of **1** in DCM , DCM+ TFA and THF+ 1M NaOH in water (1:9,v/v)

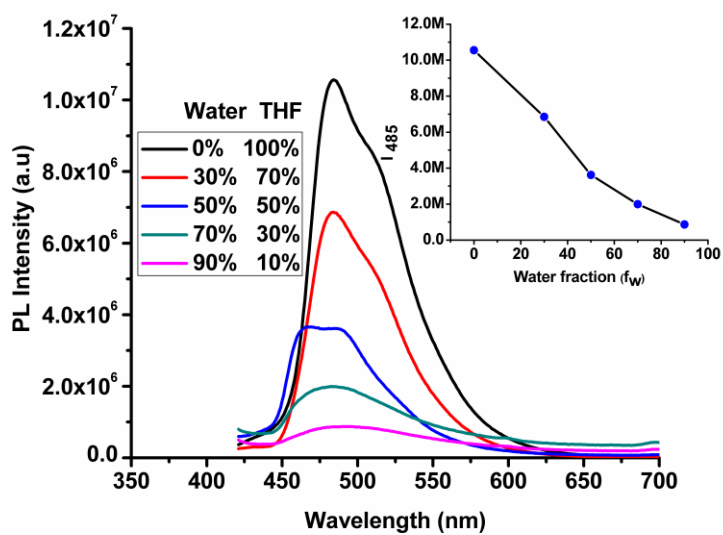

**Figure S11.** Emission spectra of **1** in presence of different water fraction (0 - 90%).



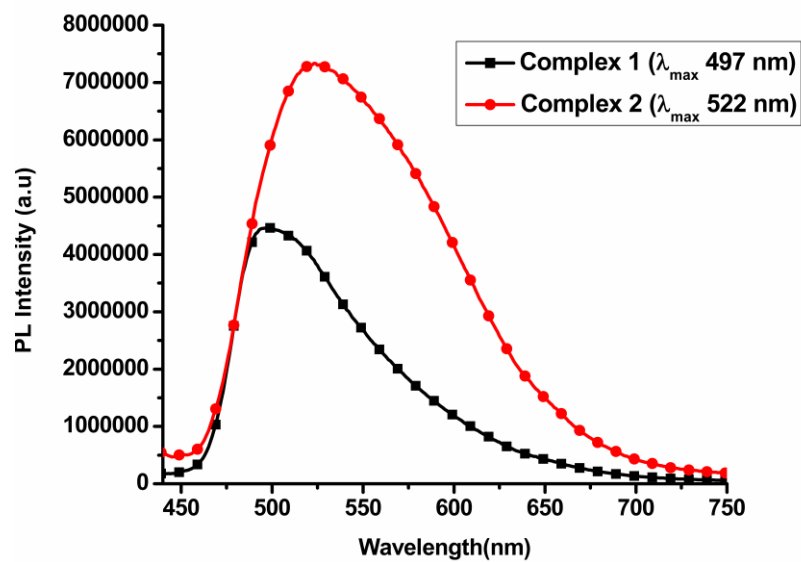

**Figure S12.** Thin film emission of **1** and **2**

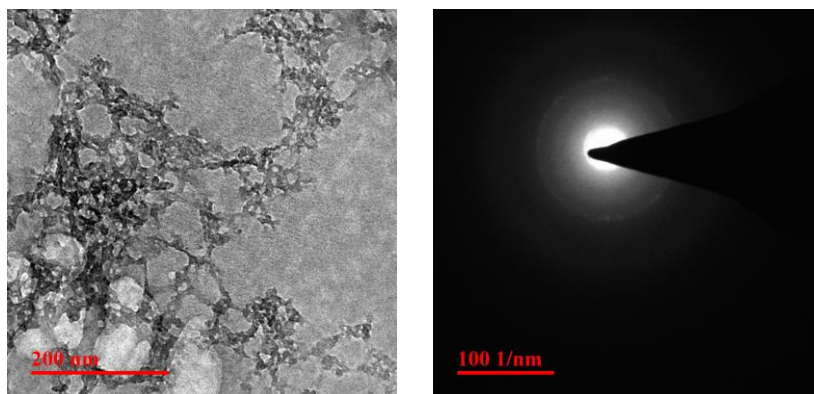

a

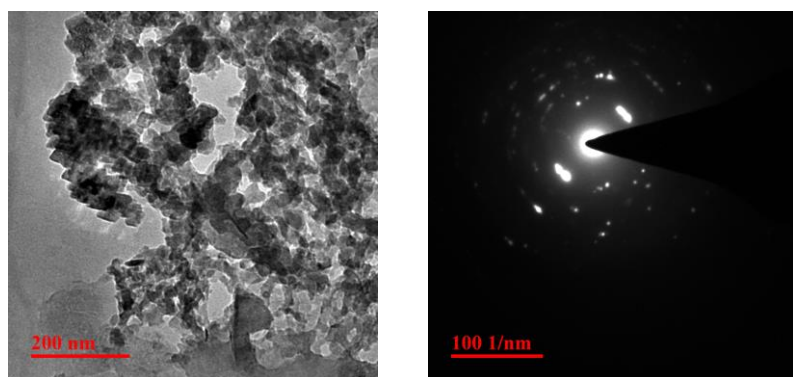

b

**Figure S13.** TEM images and ED patterns of **2** (a) amorphous nano aggregates at  $f_w=40\%$  and (b) crystalline aggregate at  $f_w=90\%$

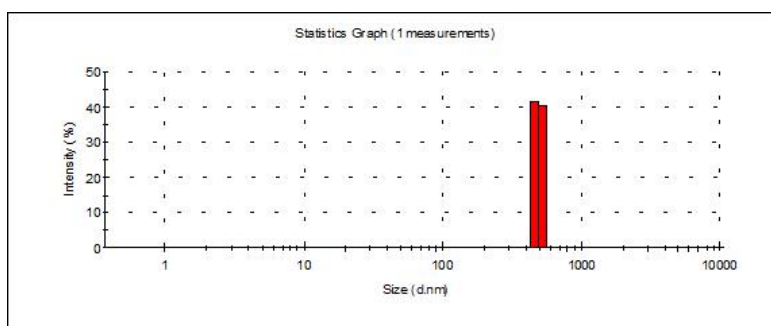

a

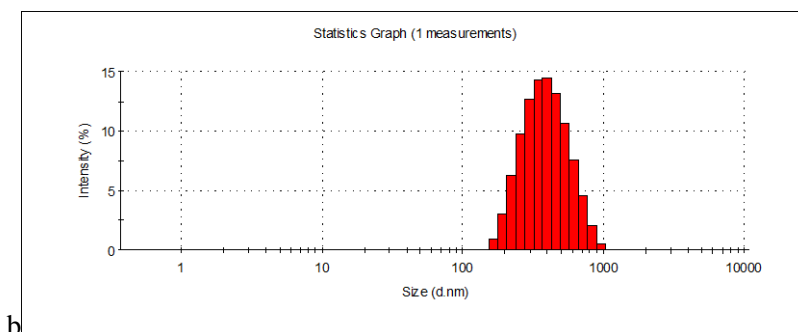

b

b

**Figure S14.** (a,b) Size distribution graph for **1** in presence of different 1M NaOH fractions (a) at 50% , (b) at 90%

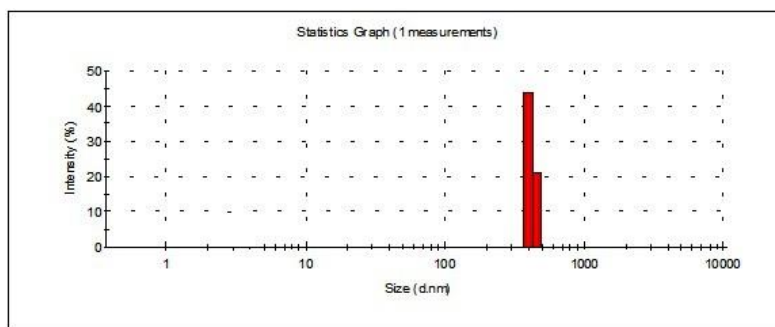

a

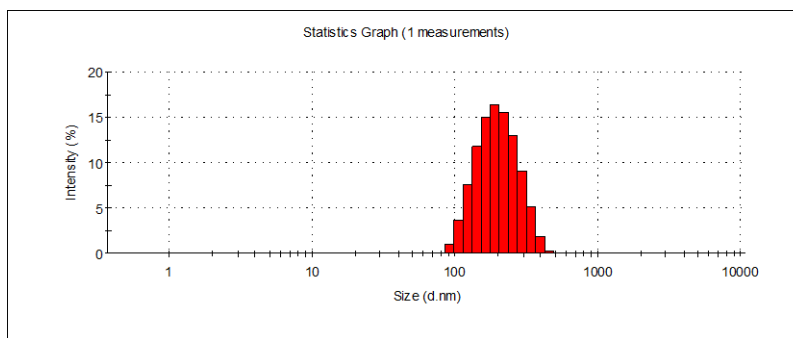

b

**Figure S15.** Size distribution graph for **1** in presence of different water fractions (a) at 50%, (b) at 90%

**Table S1.** Crystal data and structure refinement for **1**

|                                            |                                                                                                                             |
|--------------------------------------------|-----------------------------------------------------------------------------------------------------------------------------|
|                                            |                                                                                                                             |
| Empirical formula                          | C <sub>43</sub> H <sub>34</sub> Cl F <sub>4</sub> Ir N <sub>4</sub>                                                         |
| Formula weight                             | 910.41                                                                                                                      |
| Temperature (K)                            | 100 K                                                                                                                       |
| Crystal system                             | Triclinic                                                                                                                   |
| Space group                                | P -1                                                                                                                        |
| Unit cell dimensions                       | a=11.2477(14) Å<br>b=11.5288(18) Å<br>c=16.682(2) Å<br>$\alpha = 103.532(7)$ , $\beta = 93.738(7)$ (4) $\gamma = 94.584(6)$ |
| Volume (Å <sup>3</sup> )                   | 2088.6(5)                                                                                                                   |
| Z                                          | 2                                                                                                                           |
| Density (Mg/m <sup>3</sup> )               | 1.448                                                                                                                       |
| Absorption coefficient (mm <sup>-1</sup> ) | 3.311                                                                                                                       |
| F(000)                                     | 900.0                                                                                                                       |

**Table S2.** Selected Bond lengths [Å] and angles [°] for **1**

| Bond distances (Å) | Complex 1 |
|--------------------|-----------|
| Ir1- C33           | 2.020 (8) |
| Ir1- C22           | 2.019 (9) |
| Ir1-Cl1            | 2.485 (2) |
| Ir1-N3             | 2.052 (7) |
| Ir1-N4             | 2.049 (7) |
| Ir1-N1             | 2.193 (7) |
|                    |           |
| Bond angles (°)    |           |
| N4 Ir1 Cl1         | 87.8 (2)  |
| N3 Ir1 Cl1         | 96.5 (2)  |
| N1 Ir1 Cl1         | 87.2 (2)  |
| N3 Ir1 C22         | 80.4 (3)  |
| N4 Ir 1N3          | 172.4 (2) |
| N1 Ir1 C33         | 176.8 (2) |

**Table S3** Photophysical properties of **1**, **2** and **3**

| Complex                | UV-Vis absorption <sup>a</sup><br>nm, ( $\epsilon \times 10^4$ , M <sup>-1</sup> cm <sup>-1</sup> ) | PL <sup>a</sup><br>( $\lambda_{\text{emi}}$ )<br>(nm) | $\tau$<br>( $\mu\text{s}$ ) <sup>b</sup> | QY <sup>c</sup> | QY <sup>d</sup> |
|------------------------|-----------------------------------------------------------------------------------------------------|-------------------------------------------------------|------------------------------------------|-----------------|-----------------|
| <b>1</b><br>(solution) | 262 (5.0), 331(1.2)<br>388(0.52),<br>436(0.32),468(0.10)                                            | 485                                                   | 1.3                                      | 3.0             |                 |
| <b>1</b><br>(Solid)    |                                                                                                     | 497                                                   |                                          |                 | 3.08            |
| <b>2</b><br>(solution) | 256(4.42),<br>383(0.64),<br>433(0.28),464(0.14)                                                     | 507                                                   |                                          | 2.5             |                 |
| <b>2</b><br>(solid)    |                                                                                                     | 522                                                   |                                          |                 | 3.40            |
| <b>3</b><br>(solution) | 262(3.50),<br>329(0.50),<br>435(0.16), 468(0.08)                                                    | 507                                                   |                                          | 0               |                 |
| <b>3</b><br>(Solid)    |                                                                                                     | 510                                                   |                                          |                 | 0               |

<sup>a</sup> Spectra were recorded in degassed dichloromethane (DCM) at room temperature with  $\epsilon \times 10^4$ , M<sup>-1</sup>cm<sup>-1</sup>;

<sup>b</sup> Life time data recorded in DCM with [c]=1 x 10<sup>-4</sup> M ; <sup>c</sup>solid state quantum yield for **1-3** were calculated using integrating sphere. <sup>d</sup>quantum yields for the two complexes were measured in degassed DCM against quinine sulfate in 1.0 N sulfuric acid as reference (QY = 0.546).

**Table S4.** Comparison of some selected structural parameters (i.e., bond distances and bond angles) for the complex 1 obtained from experiment (i.e., X-ray study) and theoretical calculation.

| Structural parameters | Specific bond/angle | Exp. value (Å) | Theoretical value (Å) |
|-----------------------|---------------------|----------------|-----------------------|
| Bond Length           | Ir-Cl               | 2.485 (2)      | 2.53                  |
|                       | Ir-N1               | 2.193 (7)      | 2.23                  |
|                       | Ir-N3               | 2.054 (7)      | 2.04                  |
|                       | Ir-C33              | 2.020 (8)      | 1.99                  |
|                       | Ir-N4               | 2.049 (7)      | 2.04                  |
|                       | Ir-C22              | 2.019 (9)      | 1.99                  |
| Bond angle            | ∠C33IrN4            | 80.9° (3)      | 80.63°                |
|                       | ∠C22IrN3            | 80.4° (3)      | 80.62°                |
|                       | ∠C22IrN4            | 95.6° (3)      | 96.05°                |
|                       | ∠N1IrN3             | 90.5° (3)      | 90.50°                |
|                       | ∠N1IrCl             | 87.2° (2)      | 87.08°                |
|                       | ∠C22IrC33           | 90.7° (3)      | 87.40°                |
|                       | ∠N3IrC33            | 92.7° (3)      | 94.03°                |
|                       | ∠N3IrCl             | 96.5° (2)      | 96.03°                |
|                       | ∠C33IrCl            | 92.7° (2)      | 94.33°                |
|                       | ∠N4IrN1             | 95.9° (3)      | 94.96°                |
|                       | ∠N1IrC22            | 89.7° (3)      | 91.04°                |



### Detection limit calculation <sup>1,2</sup>

To determine the Signal/Noise ratio, the emission intensity of both complexes without  $H^+/OH^-$  was measured by 10 times and the standard deviation of blank measurements was determined.

The detection limit is then calculated with the following equation.

**Detection limit =  $3\sigma/m$** ; where  $\sigma$  is the standard deviation of blank measurements,  $m$  is the slope between the plot of PL intensity versus sample concentration.

### References :

1. Yang, Mi-H.; Thirupathi, P.; Lee, K.-H.; *Org. Lett.* **2011**, *13*, 5028.
2. Kaur, . S.; Bhalla, V.; Vij, V.; Kumar, M. ; *J. Mater. Chem. C* **2014**, *2*, 3936.
